# Supplementary material for: Identification, Expression and Evolutional Analysis of Two cyp19-like Genes in Amphioxus
Source: MDPI journal article supplement (doi:10.3390/ani14081140), 2024-04-09
Supplement: s1 [file s1]

**Table S1.** The GenBank accession numbers .**Title 1**

NP\_000094.2 aromatase [*Homo sapiens*]  
 NP\_001335100.1 aromatase [*Mus musculus*]  
 XP\_046780576.1 aromatase [*Gallus gallus*]  
 NP\_001090630.1 CYP19A1 [*Xenopus tropicalis*]  
 XP\_043533302.1 aromatase [*Chiloscyllium plagiosum*]  
 XP\_048418626.1 aromatase [*Stegostoma fasciatum*]  
 XP\_020386362.2 aromatase [*Rhincodon typus*]  
 XP\_038669275.1 aromatase [*Scyliorhinus canicula*]  
 XP\_041030878.1 aromatase [*Carcharodon carcharias*]  
 XP\_032906075.1 aromatase [*Amblyraja radiata*]  
 XP\_042199999.1 aromatase [*Callorhinchus milii*]  
 XP\_038850963.1 aromatase-like [*Salvelinus namaycush*]  
 XP\_014030724.1 aromatase [*Salmo salar*]  
 XP\_026865672.2 aromatase [*Electrophorus electricus*]  
 XP\_026877222.2 brain aromatase [*Electrophorus electricus*]  
 XP\_042608630.1 brain aromatase [*Cyprinus carpio*]  
 XP\_042599607.1 ovarian aromatase-like [*Cyprinus carpio*]  
 XP\_026031446.1 brain aromatase-like [*Astatotilapia calliptera*]  
 XP\_026019473.1 aromatase [*Astatotilapia calliptera*]  
 XP\_005450866.1 brain aromatase [*Oreochromis niloticus*]  
 NP\_571229.3 aromatase [*Danio rerio*]  
 XP\_021326198.1 CYP19A1b [*Danio rerio*]  
 NP\_001265808.1 aromatase [*Oryzias latipes*]  
 XP\_011474159.1 CYP19A1b [*Oryzias latipes*]  
 XP\_035672840.1 aromatase-like [*Branchiostoma floridae*]  
 XP\_035669280.1 aromatase-like [*Branchiostoma floridae*]  
 XP\_019626033.1 aromatase-like [*Branchiostoma belcheri*]  
 XP\_019639573.1 aromatase-like [*Branchiostoma belcheri*]  
 XP\_032801472.1 aromatase [*Petromyzon marinus*]  
 XP\_033105836.1 aromatase-like [*Anneissia japonica*]  
 XP\_057290659.1 aromatase-like [*Hydractinia symbiolongicarpus*]  
 NP\_001189784.1 cytochrome P450 3A4 isoform 2 [*Homo sapiens*]  
 BAB20498.1 cytochrome P450, CYP3A [*Mus musculus*]  
 NP\_001001751.2 cytochrome P450 family 3 subfamily A member 5 [*Gallus gallus*]  
 NP\_997838.1 cytochrome P450, family 3, subfamily c, polypeptide 1 [*Danio rerio*]  
 NP\_001292334.1 cytochrome P450, family 3, subfamily A [*Oryzias latipes*]  
 AGO32790.1 Cyp3A [*Azumapecten farreri*]  
 CAB4069313.1 CYP3A [*Lepeophtheirus salmonis*]  
 CAG2198897.1 CYP3A [*Mytilus edulis*]  
 CAE1256603.1 CYP3A [*Sepia pharaonis*]  
 AAA52140.1 CYP17A [*Homo sapiens*]  
 AAT01928.1 CYP17A [*Mus musculus*]  
 AUD11671.1 steroid 17-alpha-hydroxylase/17,20 lyase [*Anser cygnoides*]  
 AAT01120.1 cytochrome P450c17 [*Chelydra serpentina*]  
 NP\_001090540.2 cytochrome P450 family 17 subfamily A member 1 [*Xenopus laevis*]  
 AAP41821.1 ovarian cytochrome P450c17 [*Danio rerio*]  
 AAR88432.1 P450c17 [*Anguilla japonica*]  
 NP\_001118219.1 steroid 17-alpha-hydroxylase/17,20 lyase [*Oncorhynchus mykiss*]

---

WLF94733.1 steroid 17-alpha-hydroxylase/17,20 -like protein [*Apostichopus japonicus*]  
NP\_001187242.1 steroid 17-alpha-hydroxylase/17,20 [*Ictalurus punctatus*]  
NP\_001266694.1 steroid 17-alpha-hydroxylase/17,20 -like [*Oreochromis niloticus*]  
XP\_020555398.1 steroid 17-alpha-hydroxylase/17,20 isoform X1 [*Oryzias latipes*]  
BAF61104.1 cytochrome P450 17alpha-hydroxylase/17, 20- [*Branchiostoma belcheri*]  
AAA52140.1 CYP17A [*Homo sapiens*]  
AAT01928.1 CYP17A [*Mus musculus*]  
AUD11671.1 steroid 17-alpha-hydroxylase/17,20 lyase [*Anser cygnoides*]  
AAT01120.1 cytochrome P450c17 [*Chelydra serpentina*]  
NP\_001090540.2 cytochrome P450 family 17 subfamily A member 1 L [*Xenopus laevis*]  
AAP41821.1 ovarian cytochrome P450c17 [*Danio rerio*]  
AAR88432.1 P450c17 [*Anguilla japonica*]  
NP\_001118219.1 steroid 17-alpha-hydroxylase/17,20 lyase [*Oncorhynchus mykiss*]  
WLF94733.1 steroid 17-alpha-hydroxylase/17,20-like protein [*Apostichopus japonicus*]  
NP\_001187242.1 steroid 17-alpha-hydroxylase/17,20 lyase [*Ictalurus punctatus*]  
NP\_001266694.1 steroid 17-alpha-hydroxylase/17,20 lyase-like [*Oreochromis niloticus*]  
XP\_020555398.1 steroid 17-alpha-hydroxylase/17,20 lyase isoform X1 [*Oryzias latipes*]  
AAB59440.1 steroid 21-hydroxylase [*Homo sapiens*]  
BAA31153.1 steroid 21-hydroxylase [*Mus musculus*]  
AFN53625.1 CYP21 [*Chrysolophus pictus*]  
BAF63009.1 steroid 21-hydroxylase [*Gallus gallus*]  
NP\_001087443.1 cytochrome P450 family 21 subfamily A member 2, 1 L [*Xenopus laevis*]  
BAC76051.1 cytochrome P450 21-hydroxylase [*Anguilla japonica*]  
KAB7505058.1 Steroid 21-hydroxylase [*Armadillidium nasatum*]

---
